# Supplementary material for: Modulation of Plasma Lipidomic Profiles in Metastatic Castration-Resistant Prostate Cancer by Simvastatin
Source: MDPI journal article supplement (doi:10.3390/cancers14194792), 2022-09-30

**Supplementary Information**

**Table of Contents**

Supplementary Methods .....2

Table S1 .....3

Table S2 .....5

Table S3 .....6

Table S4 .....8

Figure S1.....9

Figure S2.....10

Figure S3.....11

## Supplementary Methods

List of inclusion and exclusion criteria for the clinical trial.

### ***Inclusion criteria***

1. Males with castration-resistant metastatic prostate cancer (as per PCWG3) AND commencing docetaxel, cabazitaxel, abiraterone or enzalutamide for disease progression.
2. Age  $\geq$  18 yrs.
3. WHO ECOG performance status 0-2.
4. Histological confirmation of prostate cancer.
5. Adequate hepatic function with serum total bilirubin  $\leq$  1.5 x upper limit of normal range and ALT and AST  $\leq$  2.5x upper limit of normal range (or  $<$  5.0 times ULN with documented liver metastases), serum albumin  $>$  25 g/L, and ALP  $\leq$  5x upper limit of normal range.
6. Adequate renal function (with calculated creatinine clearance  $>$ 50 ml/min based on the Cockcroft-Gault method, 24 hour urine or GFR scan) and serum creatinine  $\leq$  1.5 x upper limit of normal range.
7. Willing and able to comply with all study requirements, including treatment and biospecimen Collection.
8. Signed written informed consent.

### ***Exclusion criteria***

1. Patients already receiving a lipid lowering agent(s), or have received one in the last 4 weeks.
2. Known hypersensitivity to statins or its excipients.
3. Prior myopathy with a lipid lowering agent.
4. Active hepatic disease, including chronic active hepatitis B or hepatitis C. Testing for these is not mandatory unless clinically indicated.
5. Serious medical or psychiatric conditions that might limit the ability of the patient to comply with the protocol.

**Table S1:** Mean percent difference of total plasma levels of lipid classes in two comparisons.

(A) baseline lipidomic profiles with 3-lipid signature vs those without 3-lipid signature; and (B) post-simvastatin lipidomic profiles of men with 3-lipid signature vs baseline lipidomic profiles without 3-lipid signature.

Statistically significant results, where p-value <0.05 by t-tests, are bolded.

| Lipid Class                            | A) Baseline lipidomic profiles with 3-lipid signature vs those without 3-lipid signature |               | B) Post-simvastatin lipidomic profiles of men with 3-lipid signature vs baseline lipidomic profiles without 3-lipid signature |              |
|----------------------------------------|------------------------------------------------------------------------------------------|---------------|-------------------------------------------------------------------------------------------------------------------------------|--------------|
|                                        | Mean Percent Difference (%)                                                              | P-value       | Mean Percent Difference (%)                                                                                                   | P-value      |
| <div> <div> </div> <div> </div> </div> |                                                                                          |               |                                                                                                                               |              |
| <b>Sphingolipids</b>                   |                                                                                          |               |                                                                                                                               |              |
| Cer(d)                                 | 1.5                                                                                      | 0.854         | 7.2                                                                                                                           | 0.437        |
| Cer(m)                                 | -38.7                                                                                    | <b>0.002</b>  | -12.3                                                                                                                         | 0.319        |
| C1P                                    | 28.8                                                                                     | 0.144         | 19.4                                                                                                                          | 0.264        |
| dhCer                                  | 6.0                                                                                      | 0.7           | 2.0                                                                                                                           | 0.853        |
| GM1                                    | 21.9                                                                                     | 0.187         | 26.2                                                                                                                          | 0.126        |
| GM3                                    | 19.8                                                                                     | 0.098         | 17.4                                                                                                                          | 0.216        |
| HexCer                                 | 37.6                                                                                     | <b>0.0004</b> | 5.6                                                                                                                           | 0.540        |
| Hex2Cer                                | 37.2                                                                                     | <b>0.01</b>   | 28.3                                                                                                                          | 0.078        |
| Hex3Cer                                | 42.1                                                                                     | <b>0.003</b>  | 4.5                                                                                                                           | 0.701        |
| SHexCer                                | -3.3                                                                                     | 0.762         | 16.0                                                                                                                          | 0.228        |
| SM                                     | 32.7                                                                                     | <b>0.0004</b> | 8.7                                                                                                                           | 0.225        |
| Sph                                    | 50.2                                                                                     | 0.072         | 1.5                                                                                                                           | 0.899        |
| S1P                                    | 13.3                                                                                     | 0.408         | -9.6                                                                                                                          | 0.455        |
| <b>Glycerophospholipids</b>            |                                                                                          |               |                                                                                                                               |              |
| LPC                                    | -11.9                                                                                    | 0.125         | -9.1                                                                                                                          | 0.251        |
| LPC(O)                                 | 14.9                                                                                     | 0.051         | 2.3                                                                                                                           | 0.788        |
| LPC(P)                                 | -3.2                                                                                     | 0.763         | -13.4                                                                                                                         | 0.142        |
| LPE                                    | -20.5                                                                                    | <b>0.037</b>  | -8.9                                                                                                                          | 0.430        |
| LPE(P)                                 | 0.8                                                                                      | 0.942         | -5.3                                                                                                                          | 0.615        |
| LPI                                    | -6.5                                                                                     | 0.642         | 1.8                                                                                                                           | 0.896        |
| PA                                     | -1.7                                                                                     | 0.803         | -1.6                                                                                                                          | 0.839        |
| PC                                     | 13.8                                                                                     | <b>0.036</b>  | 2.1                                                                                                                           | 0.713        |
| PC(O)                                  | 15.7                                                                                     | 0.058         | 2.3                                                                                                                           | 0.774        |
| PC(P)                                  | -0.3                                                                                     | 0.982         | -4.9                                                                                                                          | 0.681        |
| PE                                     | -10.6                                                                                    | 0.496         | 4.4                                                                                                                           | 0.801        |
| PE(O)                                  | -17.8                                                                                    | 0.126         | -2.0                                                                                                                          | 0.884        |
| PE(P)                                  | -16.0                                                                                    | 0.163         | -3.9                                                                                                                          | 0.751        |
| PG                                     | -18.3                                                                                    | 0.155         | -19.8                                                                                                                         | 0.195        |
| PI                                     | -12.2                                                                                    | 0.078         | -20.2                                                                                                                         | <b>0.011</b> |
| PIP1                                   | 23.5                                                                                     | 0.173         | -5.9                                                                                                                          | 0.593        |
| PS                                     | 18.3                                                                                     | 0.606         | 9.9                                                                                                                           | 0.659        |
| <b>Sterols</b>                         |                                                                                          |               |                                                                                                                               |              |

|               |       |               |       |       |
|---------------|-------|---------------|-------|-------|
| CE            | 13.6  | 0.060         | -5.1  | 0.420 |
| COH           | 23.9  | <b>0.0003</b> | 6.7   | 0.137 |
| DE            | 7.0   | 0.646         | 0.3   | 0.990 |
| deDE          | -11.2 | 0.620         | -34.7 | 0.192 |
| methyl-CE     | -21.8 | 0.167         | -3.6  | 0.832 |
| dimethyl-CE   | -21.7 | 0.150         | -3.1  | 0.862 |
| methyl-DE     | -14.9 | 0.379         | 0.5   | 0.983 |
| BA            | -27.0 | 0.362         | 1.3   | 0.977 |
| Fatty acyls   |       |               |       |       |
| AC            | 45.0  | <b>0.021</b>  | -0.6  | 0.971 |
| AC-OH         | 36.3  | <b>0.048</b>  | -7.0  | 0.632 |
| FFA           | 44.6  | 0.093         | 6.4   | 0.726 |
| Glycerolipids |       |               |       |       |
| DG            | -7.5  | 0.588         | -13.8 | 0.408 |
| TG [NL]       | -21.4 | 0.147         | -22.8 | 0.196 |
| TG(O) [NL]    | -34.0 | <b>0.010</b>  | -6.3  | 0.769 |
| TG(SIM)       | -18.8 | 0.182         | -22.3 | 0.177 |
| Other         |       |               |       |       |
| OxSpecies     | 8.0   | 0.644         | -2.3  | 0.839 |
| Ubiquinone    | -11.2 | 0.347         | -14.5 | 0.342 |

**Table S2:** Comparison of baseline characteristics and standard treatment received with simvastatin between men who lost the 3LS and those who retained the 3LS.

T-test was performed on continuous variables. Fisher's exact test was performed on categorical variables. "n/a" = not applicable as numbers were insufficient or not different.

| Characteristic                            | Mean (min, max), or number of men |                                      | P-value |                     |
|-------------------------------------------|-----------------------------------|--------------------------------------|---------|---------------------|
|                                           | Men who lost the signature (n=5)  | Men who retained the signature (n=6) | t-test  | Fisher's exact test |
| Age (years)                               | 73 (70, 76)                       | 76 (63, 90)                          | 0.596   |                     |
| ECOG performance:                         |                                   |                                      |         |                     |
| 0-1                                       | 5                                 | 5                                    |         | 1.000               |
| ≥2                                        | 0                                 | 1                                    |         |                     |
| Gleason grade:                            |                                   |                                      |         |                     |
| <8                                        | 3                                 | 2                                    |         | 0.318               |
| ≥8                                        | 0                                 | 3                                    |         |                     |
| Unknown                                   | 2                                 | 1                                    |         |                     |
| Site of metastasis:                       |                                   |                                      |         |                     |
| Lymph node                                | 2                                 | 3                                    |         | 1.000               |
| Bone                                      | 5                                 | 6                                    |         |                     |
| Visceral                                  | 0                                 | 1                                    |         |                     |
| Prostate-specific antigen (ng/mL)         | 92 (54, 179)                      | 59 (0.02, 197)                       | 0.406   |                     |
| Alkaline phosphatase (U/L)                | 192 (64, 509)                     | 176 (74, 564)                        | 0.893   |                     |
| Lactate dehydrogenase (U/L)               | 246 (174, 290)                    | 329 (211, 518)                       | 0.175   |                     |
| Haemoglobin (g/L)                         | 120 (94,131)                      | 122 (102, 138)                       | 0.824   |                     |
| Metabolic risk factors:                   |                                   |                                      |         |                     |
| Diabetes*                                 | 0                                 | 0                                    |         | n/a                 |
| Hyperlipidaemia                           | 1                                 | 0                                    |         | n/a                 |
| Hypertension                              | 2                                 | 1                                    |         | n/a                 |
| BMI                                       | 31 (26, 36)                       | 25 (19, 30)                          | 0.02    |                     |
| Waist circumference (cm)                  | 115 (104, 132)                    | 94 (76, 109)                         | 0.02    |                     |
| Treatment:                                |                                   |                                      |         |                     |
| Taxane (docetaxel, cabazitaxel)           | 3 dcx, 1 cbx                      | 4 dcx                                |         | 1.000               |
| Anti-androgen (enzalutamide, abiraterone) | 1 enza                            | 2 abi                                |         |                     |

\* There was only diabetic patient in the cohort, and his post-simvastatin plasma was not available.

**Table S3:** Differences in total plasma levels of lipid classes between post-simvastatin and baseline samples in men who lost or retained the 3LS.

(A) men who lost the 3-lipid signature with treatment, and (B) men who retained the 3-lipid signature with treatment. Statistically significant results, where p-value <0.05 by paired sample t-tests, are bolded.

| Lipid Class          | A) Men who <u>lost</u> 3-lipid signature:<br>Post-simvastatin vs baseline |              | B) Men who <u>retained</u> 3-lipid signature:<br>Post-simvastatin vs baseline |              |
|----------------------|---------------------------------------------------------------------------|--------------|-------------------------------------------------------------------------------|--------------|
|                      | Mean Percent Difference (%)                                               | P-value      | Mean Percent Difference (%)                                                   | P-value      |
| Sphingolipids        |                                                                           |              |                                                                               |              |
| Cer(d)               | 10.6                                                                      | 0.291        | 1.54                                                                          | 0.668        |
| Cer(m)               | 71.8                                                                      | 0.081        | 23.03                                                                         | <b>0.012</b> |
| C1P                  | -10.4                                                                     | 0.531        | -4.54                                                                         | 0.803        |
| dhCer                | 13.5                                                                      | 0.423        | -16.20                                                                        | 0.466        |
| GM1                  | -26.5                                                                     | 0.389        | 37.65                                                                         | 0.104        |
| GM3                  | -20.0                                                                     | 0.079        | 15.99                                                                         | 0.066        |
| HexCer               | -35.2                                                                     | <b>0.025</b> | -11.73                                                                        | 0.235        |
| Hex2Cer              | -22.6                                                                     | 0.183        | 9.58                                                                          | 0.620        |
| Hex3Cer              | -37.1                                                                     | <b>0.026</b> | -16.26                                                                        | 0.096        |
| SHexCer              | 20.8                                                                      | 0.112        | 19.17                                                                         | 0.193        |
| SM                   | -27.2                                                                     | <b>0.029</b> | -9.50                                                                         | 0.177        |
| Sph                  | -51.6                                                                     | 0.234        | -10.75                                                                        | 0.649        |
| S1P                  | -45.3                                                                     | 0.153        | 9.13                                                                          | 0.589        |
| Glycerophospholipids |                                                                           |              |                                                                               |              |
| LPC                  | 24.7                                                                      | <b>0.046</b> | -11.79                                                                        | 0.336        |
| LPC(O)               | -16.5                                                                     | 0.076        | -6.24                                                                         | 0.691        |
| LPC(P)               | -1.8                                                                      | 0.858        | -17.30                                                                        | 0.333        |
| LPE                  | 42.3                                                                      | <b>0.024</b> | -4.34                                                                         | 0.806        |
| LPE(P)               | -8.8                                                                      | 0.558        | -3.81                                                                         | 0.518        |
| LPI                  | 8.1                                                                       | 0.703        | 9.51                                                                          | 0.461        |
| PA                   | 0.0                                                                       | 0.997        | 0.07                                                                          | 0.989        |
| PC                   | -18.7                                                                     | 0.099        | -2.67                                                                         | 0.600        |
| PC(O)                | -24.9                                                                     | <b>0.034</b> | 1.33                                                                          | 0.878        |
| PC(P)                | -12.9                                                                     | 0.242        | 2.81                                                                          | 0.689        |
| PE                   | 9.7                                                                       | 0.666        | 23.03                                                                         | 0.154        |
| PE(O)                | 28.4                                                                      | 0.089        | 11.88                                                                         | 0.350        |
| PE(P)                | 17.3                                                                      | 0.113        | 12.12                                                                         | 0.183        |
| PG                   | -0.8                                                                      | 0.969        | -2.67                                                                         | 0.841        |
| PI                   | -4.0                                                                      | 0.554        | -13.13                                                                        | 0.230        |
| PIP1                 | -38.8                                                                     | 0.139        | -8.55                                                                         | 0.403        |
| PS                   | -35.4                                                                     | 0.406        | 25.88                                                                         | <b>0.002</b> |
| Sterols              |                                                                           |              |                                                                               |              |
| CE                   | -16.4                                                                     | 0.072        | -16.38                                                                        | <b>0.001</b> |
| COH                  | -19.6                                                                     | <b>0.003</b> | -8.62                                                                         | 0.181        |
| CE+COH               | -17.0                                                                     | <b>0.04</b>  | -15.4                                                                         | <b>0.005</b> |
| DE                   | -25.7                                                                     | 0.147        | 13.84                                                                         | 0.765        |
| deDE                 | 2.7                                                                       | 0.963        | -44.25                                                                        | 0.328        |
| methyl-CE            | 43.2                                                                      | 0.156        | 8.75                                                                          | 0.536        |
| dimethyl-CE          | 49.0                                                                      | <b>0.023</b> | 6.00                                                                          | 0.729        |

|               |       |       |        |       |
|---------------|-------|-------|--------|-------|
| methyl-DE     | 48.0  | 0.158 | -2.19  | 0.901 |
| BA            | 26.1  | 0.690 | 50.21  | 0.296 |
| Fatty acyls   |       |       |        |       |
| AC            | -48.5 | 0.064 | -13.01 | 0.666 |
| AC-OH         | -40.1 | 0.103 | -24.06 | 0.371 |
| FFA           | -37.1 | 0.120 | -16.20 | 0.604 |
| Glycerolipids |       |       |        |       |
| DG            | -5.9  | 0.717 | -7.73  | 0.635 |
| TG [NL]       | 8.4   | 0.685 | -9.50  | 0.549 |
| TG(O) [NL]    | 111.4 | 0.090 | 2.03   | 0.715 |
| TG(SIM)       | 3.3   | 0.836 | -10.37 | 0.533 |
| Other         |       |       |        |       |
| OxSpecies     | 27.3  | 0.227 | -31.98 | 0.175 |
| Ubiquinone    | 16.6  | 0.474 | -17.81 | 0.073 |

**Table S4:** Differences in the plasma levels of 18 prognostic lipids between post-simvastatin and baseline samples in men who lost or retained the 3LS.

(A) men who lost the 3-lipid signature with treatment, and (B) men who keep the 3-lipid signature with treatment. Statistically significant results, where p-value <0.05 by paired sample t-tests, are bolded.

| Lipid              | A) Men who <u>lost</u> 3-lipid signature:<br>Post-simvastatin vs baseline |              | B) Men who <u>retained</u> 3-lipid signature:<br>Post-simvastatin vs baseline |              |
|--------------------|---------------------------------------------------------------------------|--------------|-------------------------------------------------------------------------------|--------------|
|                    | Mean Percent Difference (%)                                               | P-value      | Mean Percent Difference (%)                                                   | P-value      |
| Cer(d18:1/16:0)    | -28.7                                                                     | <b>0.038</b> | 1.3                                                                           | 0.892        |
| Cer(d18:1/18:0)    | -44.9                                                                     | <b>0.031</b> | 18.2                                                                          | 0.172        |
| Cer(d18:1/20:0)    | -28.7                                                                     | <b>0.010</b> | 11.8                                                                          | 0.142        |
| Cer(d18:1/24:1)    | -26.8                                                                     | <b>0.045</b> | 8.2                                                                           | 0.226        |
| GM3(d18:1/16:0)    | -37.1                                                                     | <b>0.024</b> | 8.9                                                                           | 0.437        |
| GM3(d18:1/20:0)    | -21.0                                                                     | 0.136        | 25.9                                                                          | <b>0.022</b> |
| HexCer(d18:1/16:0) | -39.0                                                                     | 0.051        | -10.9                                                                         | 0.352        |
| SM(d18:1/16:0)     | -31.5                                                                     | <b>0.021</b> | -10.2                                                                         | 0.159        |
| SM(d18:2/16:0)     | -23.3                                                                     | 0.051        | -10.6                                                                         | 0.177        |
| SM(d18:2/18:0)     | -32.9                                                                     | 0.058        | -6.2                                                                          | 0.571        |
| SM(d18:2/20:0)     | -18.4                                                                     | 0.071        | -8.3                                                                          | 0.099        |
| PC(16:0/16:0)      | -32.0                                                                     | 0.062        | -6.4                                                                          | 0.384        |
| PC(38:2)           | -9.4                                                                      | 0.501        | -15.7                                                                         | 0.113        |
| PC(P-16:0/20:4)    | -11.1                                                                     | 0.373        | 13.0                                                                          | 0.158        |
| COH                | -19.6                                                                     | <b>0.003</b> | -8.6                                                                          | 0.181        |
| PC(38:6) (a)       | 4.3                                                                       | 0.867        | 16.6                                                                          | 0.241        |
| PC(14:0/20:4)      | 97.5                                                                      | <b>0.013</b> | 27.5                                                                          | 0.403        |
| PC(40:8)           | 29.0                                                                      | <b>0.034</b> | 11.7                                                                          | 0.502        |

Higher plasma levels associated with poorer prognosis in previous mCRPC cohort (Lin et al 2017)

Lower plasma levels associated with poorer prognosis in previous mCRPC cohort (Lin et al 2017)

**Figure S1: Baseline and post-simvastatin status of clinical lipids and 3-lipid signature in each patient.**

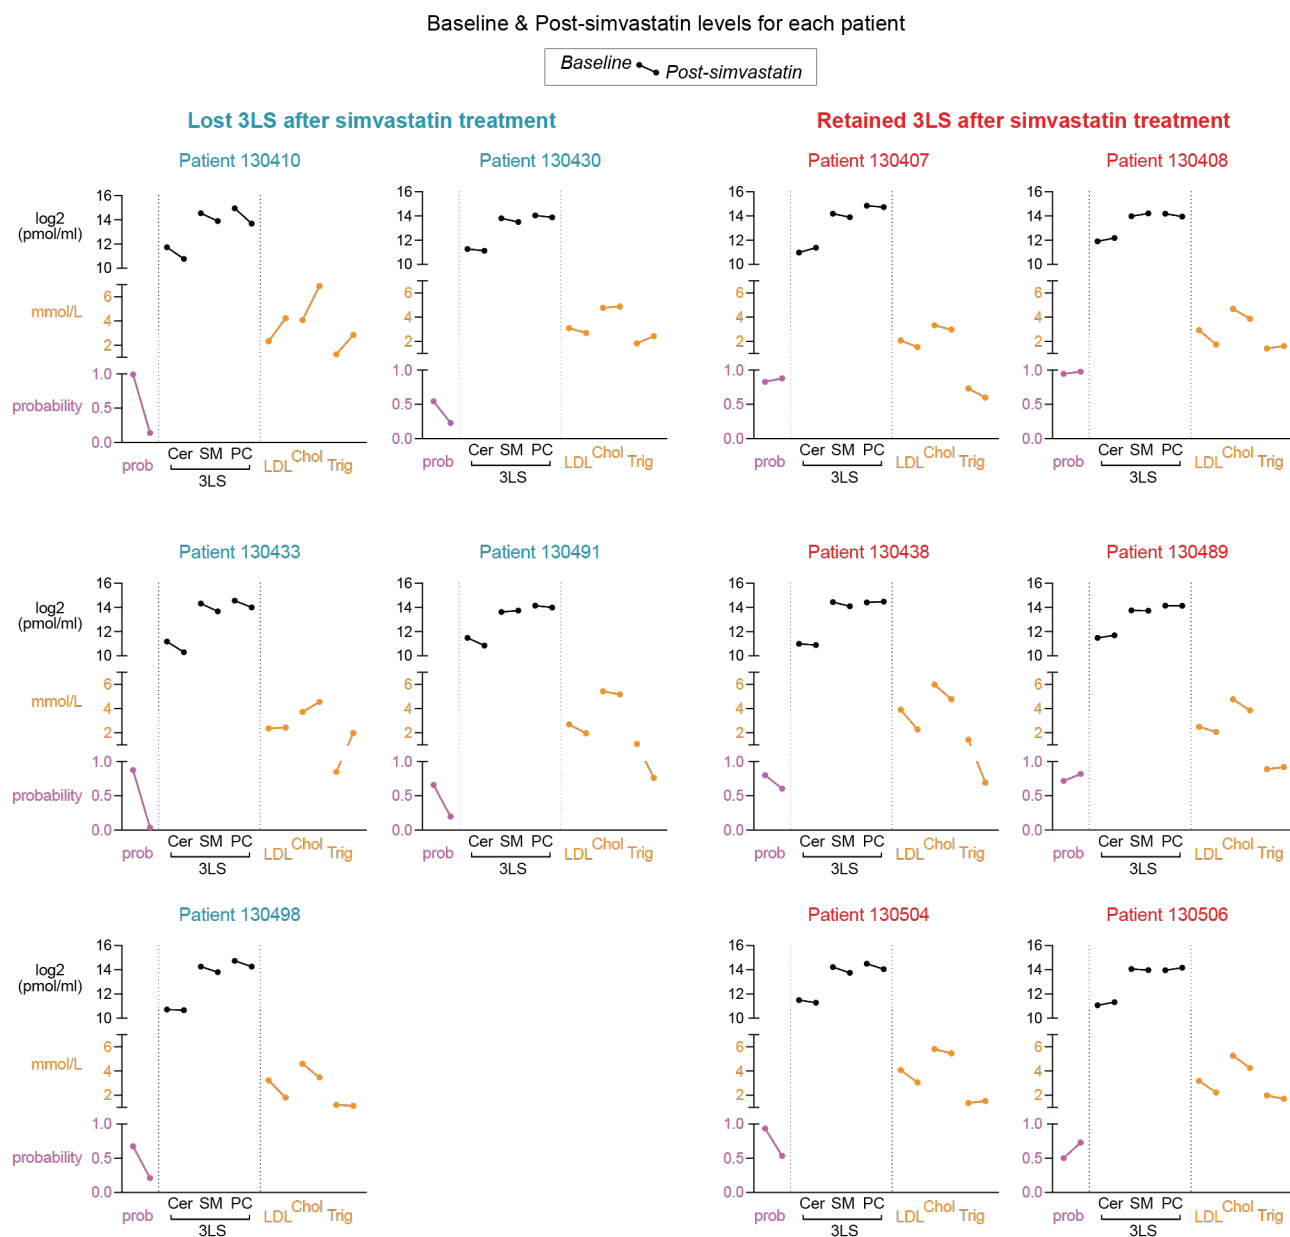

#### Abbreviations

prob, probability of having the 3LS (calculated from logistic regression model, see methods)

Cer, Cer(d18:1/24:1)

SM, SM(d18:2/16:1)

PC, PC(16:0/16:0)

LDL, LDL-C

Chol, total cholesterol

Trig, triglycerides

3LS, 3-lipid signature

**Figure S2.** Baseline and post-simvastatin status of clinical lipids and the 3-lipid signature in men who do not have the 3-lipid signature at baseline.

Four of these men gained the 3-lipid signature after simvastatin treatment.

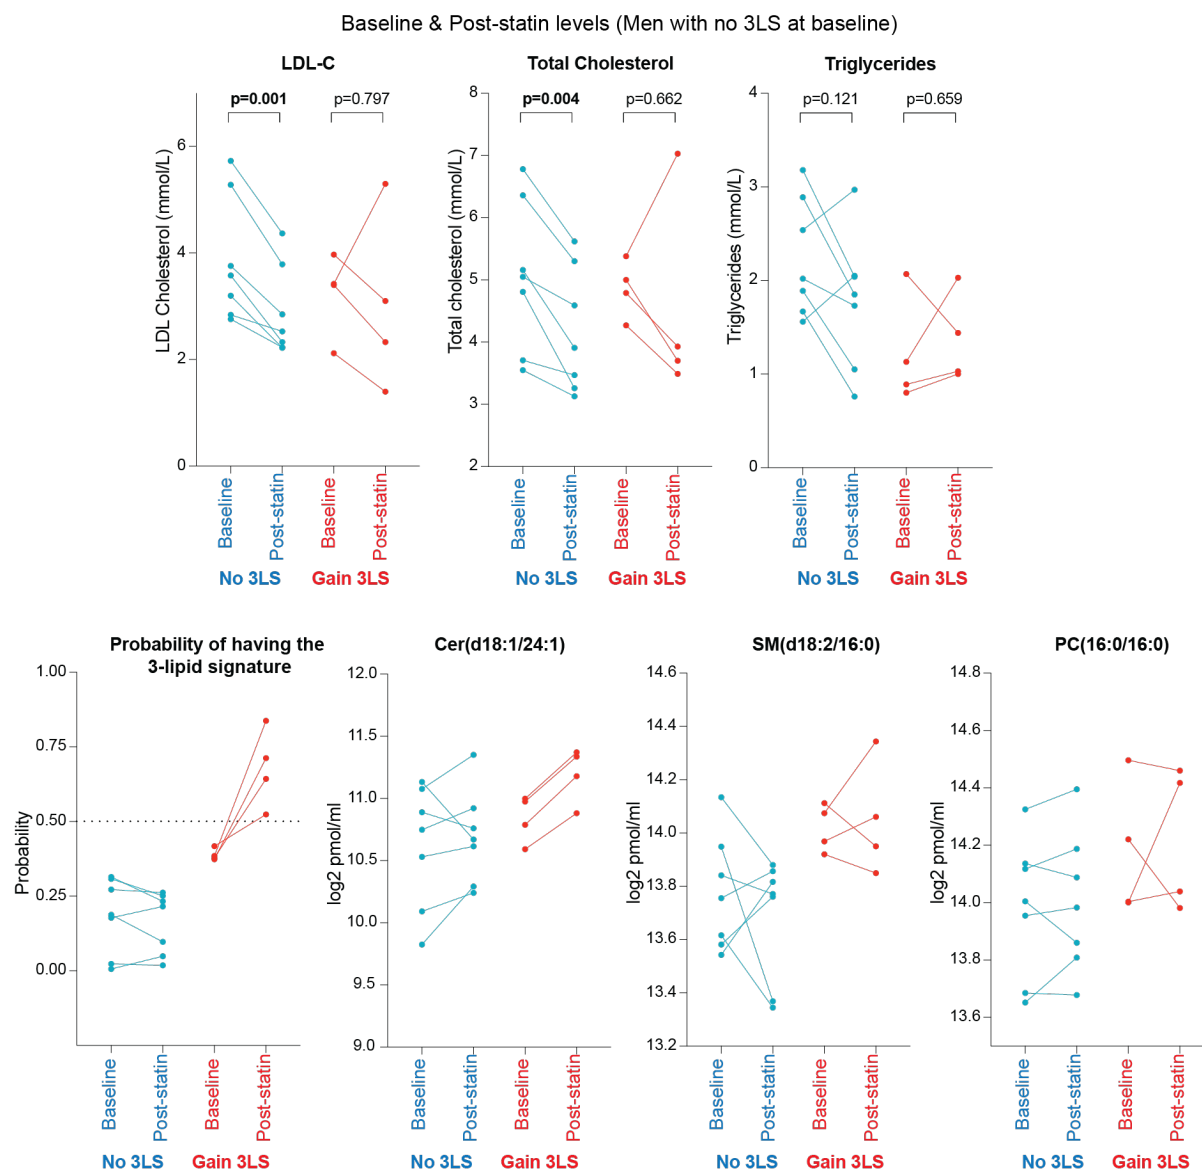

**Figure S3.** Mean percent difference of plasma levels of individual lipid species in post-simvastatin profiles versus baseline of men who do not have the 3-lipid signature at baseline.

(A) men who do not have the 3LS at both baseline & post-statin, and (B) men who gained the 3LS after statin treatment.

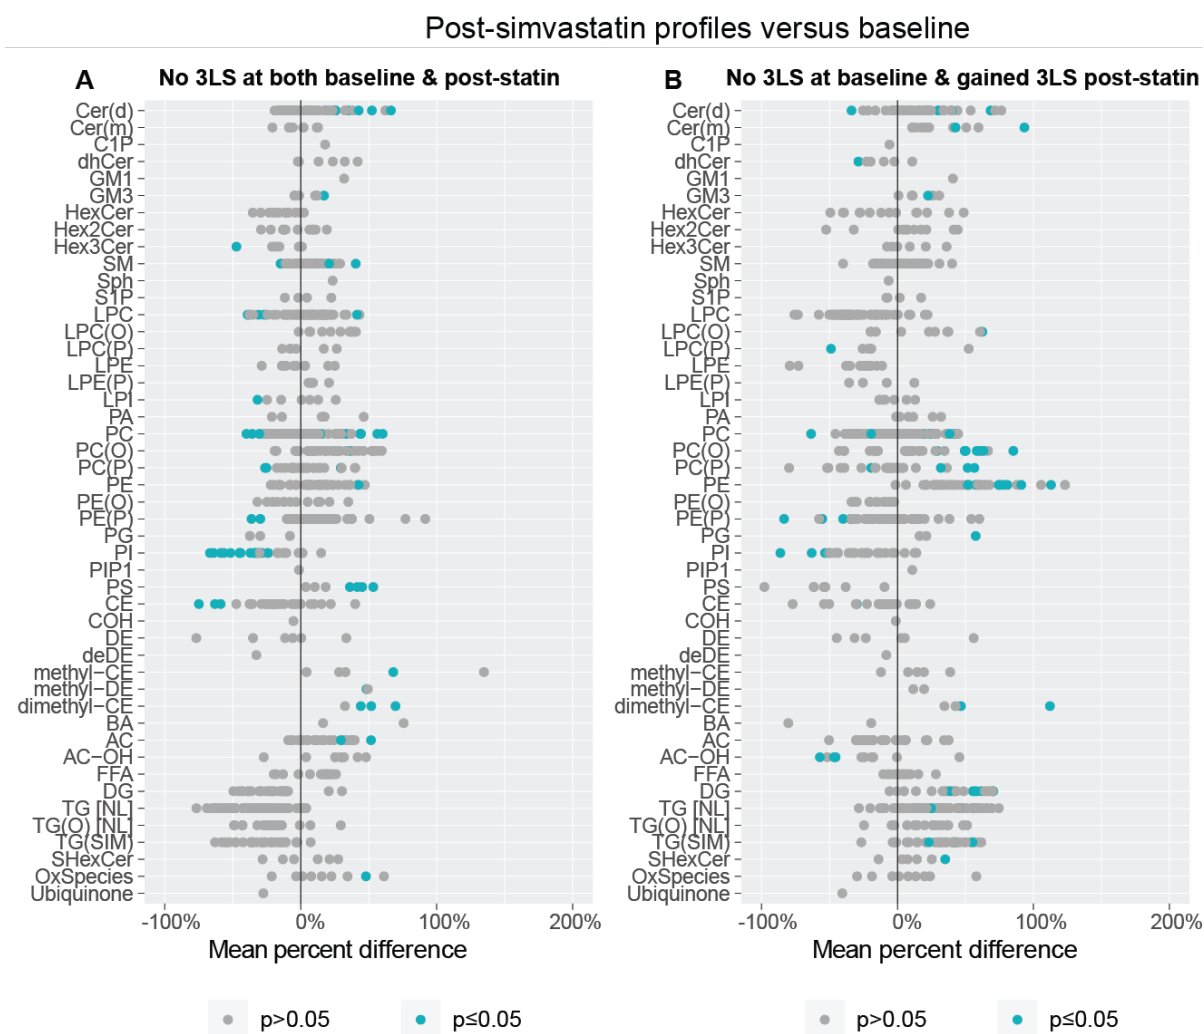

Supplement: s1 [file s1]
